# Supplementary material
Source: Springer Nature journal article supplement (https://www.springermedizin.de/resource/supplementary/12958_2013_1093_MOESM5_ESM.pdf/9566786)

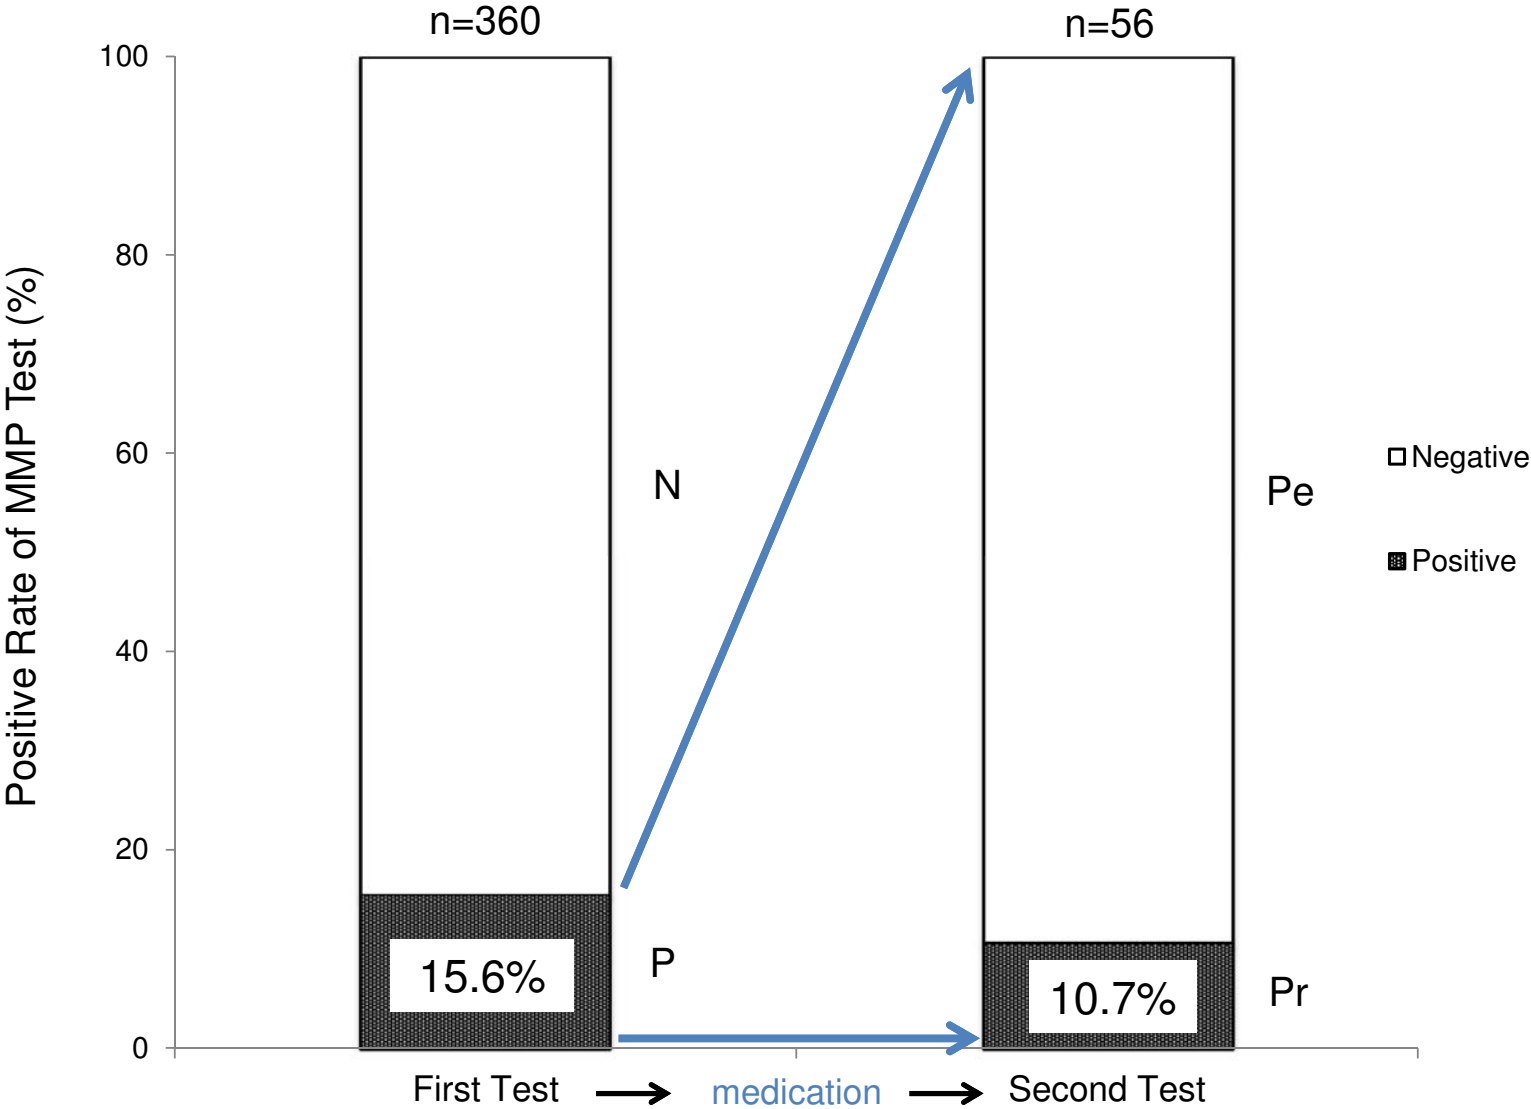

Supplement: MOESM5 [file 9566786]
